# Supplementary material for: Intra-Observer and Inter-Observer Variability of Intraocular Lens Measurements Using an Interferometry Metrology Device
Source: MDPI journal article supplement (doi:10.3390/diagnostics14020216), 2024-01-19
Supplement: s1 [file s1]

**Table S1 :** Mean and standard deviations of IOL measurements.

| Parameters            |        | IOL n°1       | IOL n°2        | IOL n°3        | IOL n°4        | IOL n°5        | IOL n°6       | IOL n°7                              | IOL n°8                              |
|-----------------------|--------|---------------|----------------|----------------|----------------|----------------|---------------|--------------------------------------|--------------------------------------|
| SE Power (D)          |        | 20.179±0.047  | 35.622 ± 0.083 | 21.829 ± 0.028 | 28.281 ± 0.052 | 22.612 ± 0.064 | 7.846 ± 0.130 | 18.964 ± 0.040                       | 22.723 ± 0.093                       |
| Cylinder (D)          |        | 0.069 ± 0.013 | 0.042 ± 0.027  | 0.063 ± 0.024  | 1.006 ± 0.029  | 1.583 ± 0.0306 | 0.168 ± 0.107 | 0.082 ± 0.025                        | 0.134 ± 0.034                        |
| Add Power (D)         |        | -             | -              | -              | 3.057 ± 0.006  | -              | -             | I: 1.608 ± 0.005<br>N: 3.356 ± 0.011 | I: 1.596 ± 0.005<br>N: 3.402 ± 0.024 |
| Far Focus<br>MTF50    | X-axis | 0.400 ± 0.006 | 0.608 ± 0.051  | 0.238 ± 0.008  | 0.294 ± 0.008  | 0.481 ± 0.017  | -             | 0.171 ± 0.006                        | 0.197±0.009                          |
|                       | Y-axis | 0.404 ± 0.008 | 0.608 ± 0.035  | 0.237 ± 0.006  | 0.292 ± 0.010  | 0.482 ± 0.015  | -             | 0.170 ± 0.008                        | 0.193±0.006                          |
| Add<br>Focus<br>MTF50 | X-axis | -             | -              | -              | 0.155 ± 0.004  | -              | -             | I: 0.058 ± 0.004<br>N: 0.101 ± 0.003 | I: 0.096 ± 0.004<br>N: 0.129 ± 0.005 |
|                       | Y-axis | -             | -              | -              | 0.156 ± 0.005  | -              | -             | I: 0.059 ± 0.005<br>N: 0.099 ± 0.002 | I: 0.096 ± 0.004<br>N: 0.130 ± 0.004 |
| Far Focus<br>MTF25    | X-axis | 0.656 ± 0.01  | 0.782 ± 0.049  | 0.280 ± 0.007  | 0.382 ± 0.007  | 0.718 ± 0.024  | 0.175 ± 0.054 | 0.227 ± 0.011                        | 0.285 ± 0.009                        |
|                       | Y-axis | 0.653 ± 0.013 | 0.788 ± 0.025  | 0.281 ± 0.009  | 0.382 ± 0.008  | 0.716 ± 0.020  | 0.156 ± 0.049 | 0.225 ± 0.010                        | 0.287 ± 0.022                        |
| Add<br>Focus<br>MTF25 | X-axis | -             | -              | -              | 0.213 ± 0.006  | -              | -             | I: 0.114 ± 0.007<br>N: 0.200 ± 0.004 | I: 0.124 ± 0.006<br>N: 0.187 ± 0.007 |
|                       | Y-axis | -             | -              | -              | 0.211 ± 0.005  | -              | -             | I: 0.114 ± 0.012<br>N: 0.198 ± 0.005 | I: 0.121 ± 0.007<br>N: 0.185 ± 0.007 |

D : diopter, I: Intermediate, MTF: Modulation Transfer Function, N: Near, SE : Spherical equivalent.
